# Supplementary material for: Pancreas agenesis mutations disrupt a lead enhancer controlling a developmental enhancer cluster
Source: PubMed Central journal article supplement (PMC9426562; doi:10.1016/j.devcel.2022.07.014), 2022-08-22
Supplement: mmc1.pdf [file mmc1.pdf]

**Developmental Cell, Volume 57**

**Supplemental information**

**Pancreas agenesis mutations**

**disrupt a lead enhancer controlling**

**a developmental enhancer cluster**

**Irene Miguel-Escalada, Miguel Ángel Maestro, Diego Balboa, Anamaria Elek, Aina Bernal, Edgar Bernardo, Vanessa Grau, Javier García-Hurtado, Arnau Sebé-Pedrós, and Jorge Ferrer**

**A**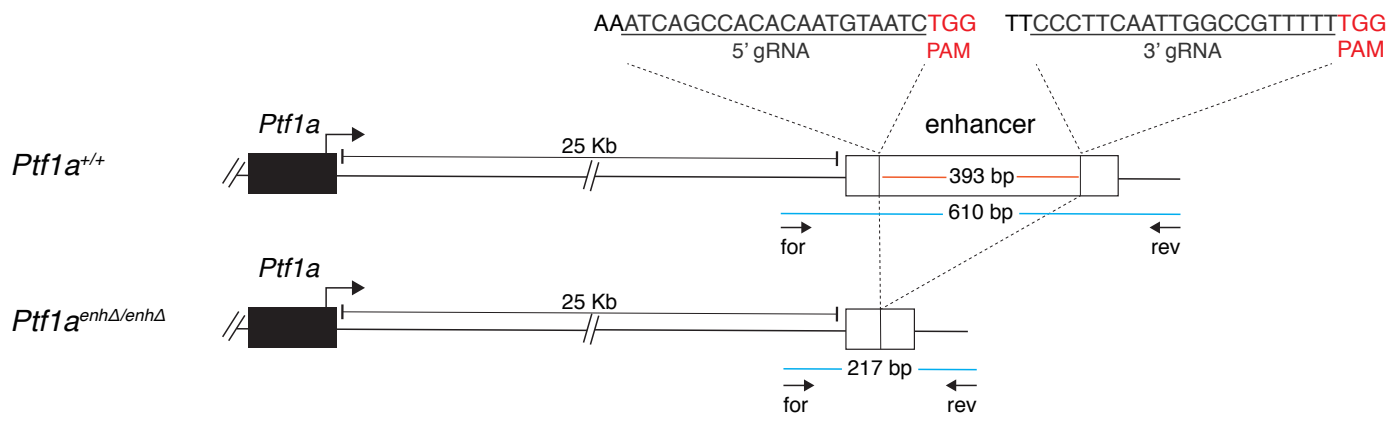**B**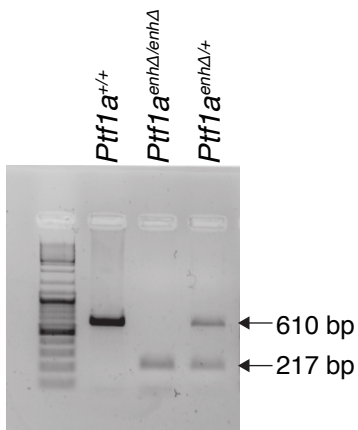**C**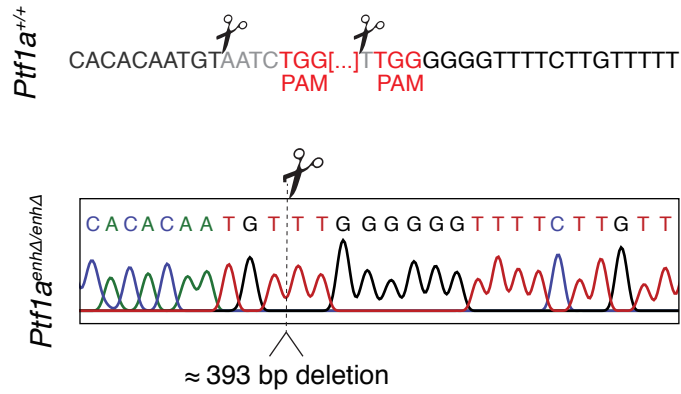**D**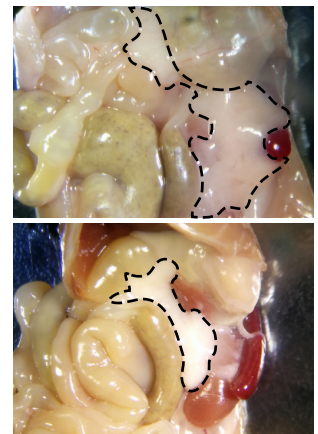**E**

E9.5 pancreas

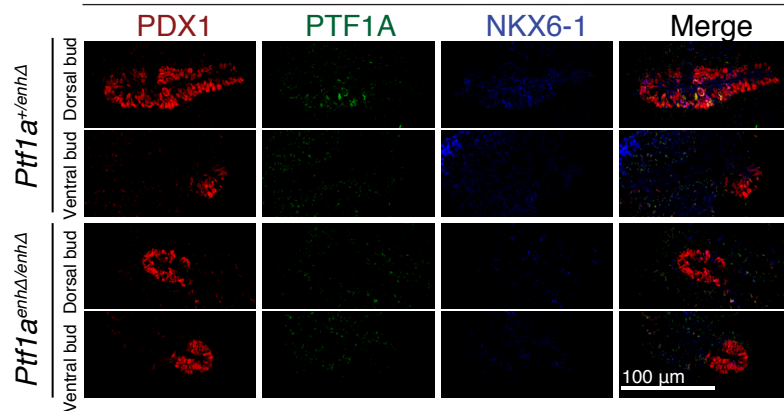**F**

E9.75 pancreas

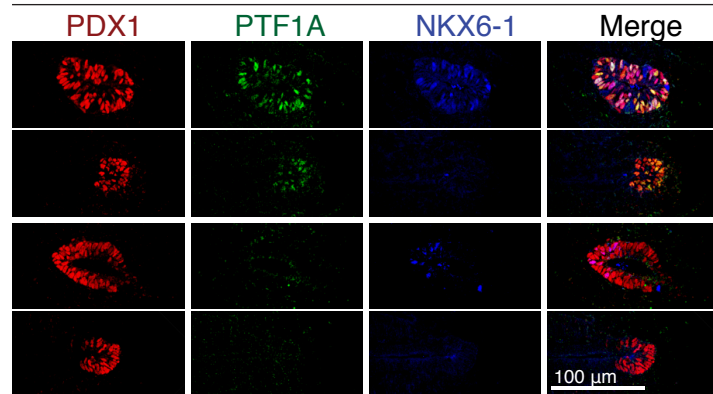**G**

E10.5 pancreas

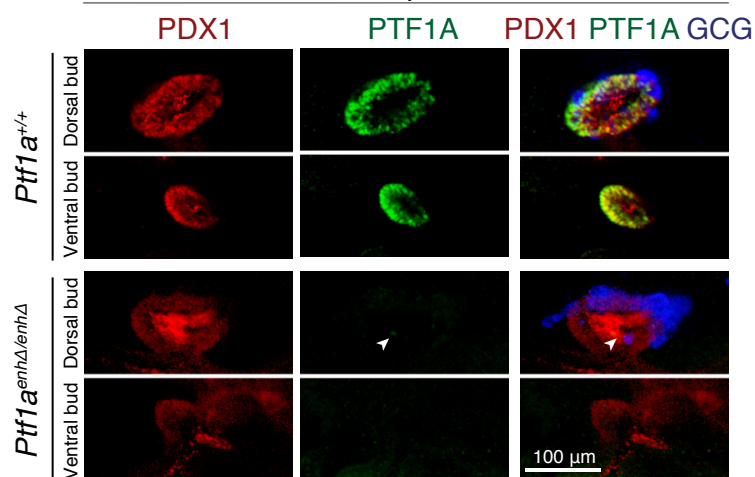**H**

E11.5 pancreas

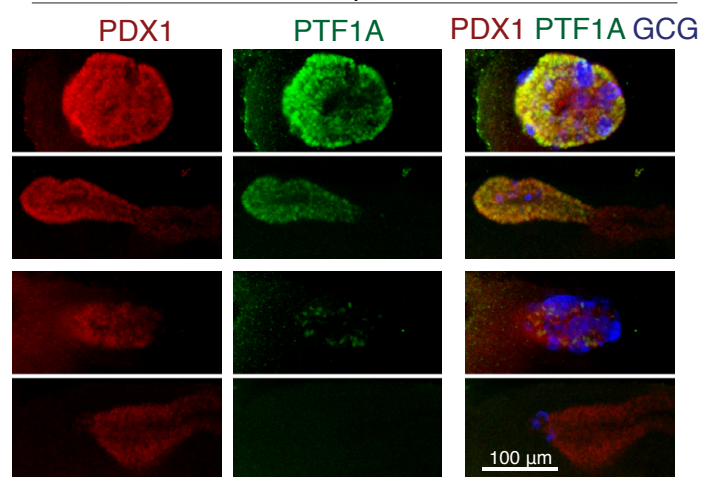

**Figure S1. CRISPR-Cas9 engineering of *Ptf1a* enhancer deletion in mouse. Related to Figures 1 and 2.**

**(A)** Schematic of mouse *Ptf1a<sup>enhP</sup>* enhancer deletion in mouse including 5'gRNA and 3'gRNA sequences and PAM sites (red) within the enhancer, leading to a 393 bp deletion. The location of genotyping primers (black arrows) as well as expected PCR product sizes (blue) are shown. **(B)** Agarose gel showing the PCR product generated when genotyping *Ptf1a* enhancer region (610 bp) in wild type, heterozygous and homozygous mice. Successful enhancer deletion generates PCR product of 217bp. **(C)** Sanger sequencing chromatogram of the region flanking *Ptf1a* enhancer deletion. PAM sequence is in red and scissors indicate breakpoints. **(D)** Brightfield image of dissected 7 week-old wild type and *Ptf1a<sup>enhΔ/enhΔ</sup>* littermates. The pancreas is delimited by a dashed line, showing hypoplasia in mutant mice. **(E-H)** Confocal images showing that PTF1A is depleted in pancreatic MPCs that form ventral and dorsal buds in E9.5 **(E)**, E9.75 **(F)** and E10.5 **(G)** *Ptf1a<sup>enhΔ/enhΔ</sup>* embryos. Note that PTF1A expression in control embryos increases progressively between E9.5 and E10.5. PDX1 expression is moderately reduced in *Ptf1a<sup>enhΔ/enhΔ</sup>* pancreas. Extracellular background fluorescence in buds is indicated with an arrowhead. **(H)** At E11.5 PTF1A is detected in a few cells of *Ptf1a<sup>enhΔ/enhΔ</sup>* dorsal buds, which may represent incipient pro-acinar progenitors, while it is still absent in the ventral bud. Wild-type littermates (*Ptf1a<sup>+/+</sup>*) or *Ptf1a<sup>+/enhΔ</sup>* embryos are shown as control, as indicated.

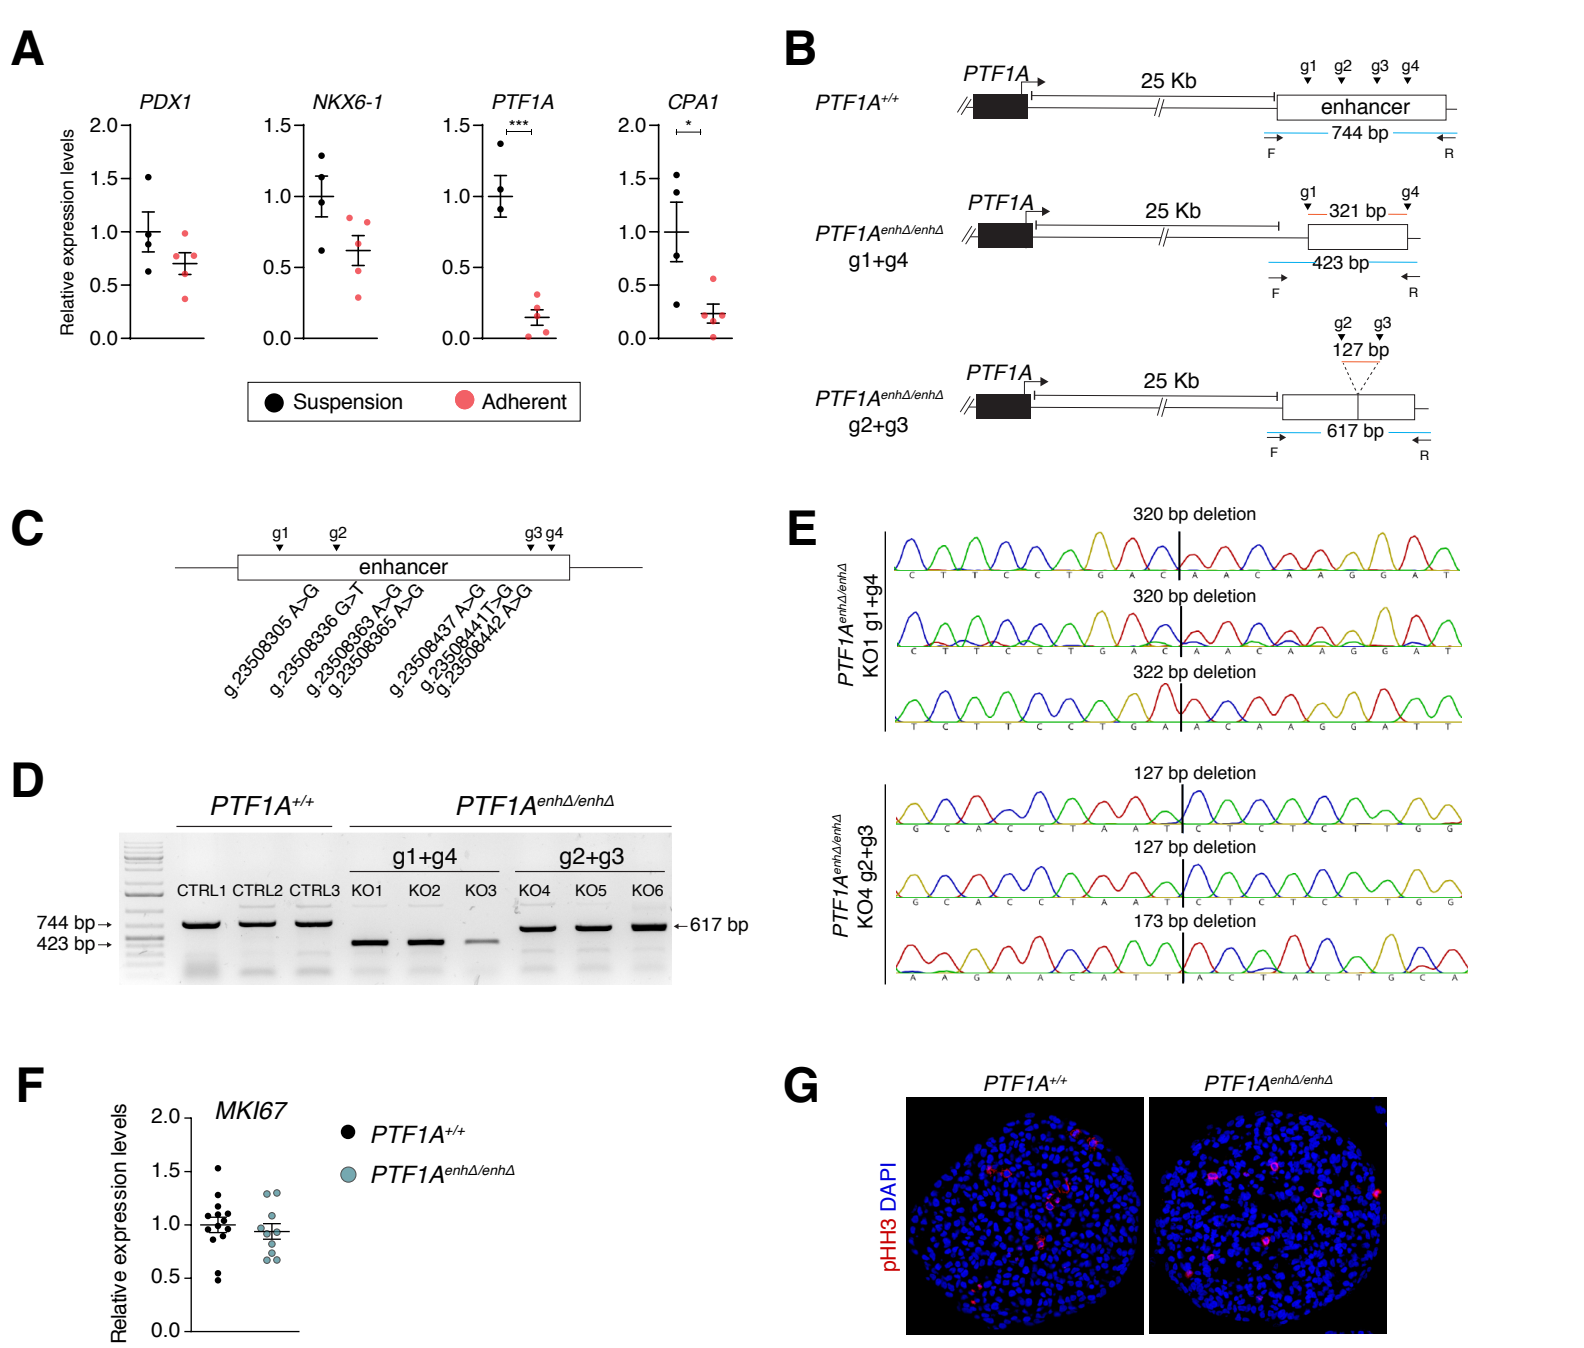

**Figure S2. Modeling *PTF1A* enhancer deficiency in human pancreatic MPCs. Related to Figure 3.**

**(A)** qRT-PCR of multipotency markers in human MPCs differentiated in suspension or adherent conditions ( $n = 4-5$  independent differentiation experiments per condition, using 3 control hPSC lines). **(B)** Schematic of *PTF1A* enhancer deletion in hPSCs depicting gRNAs cutting sites within the enhancer (g1 to g4, black arrowheads), leading to 321 (g1+4) or 127 (g2+3) nucleotide deletions. The location of genotyping primers (arrows), as well as expected PCR product sizes (blue) are shown. **(C)** Schematic representation of the location of single base pair mutations described in human patients (Gabbay et al., 2017; Weedon et al., 2014) relative to the cut sites of gRNAs employed to generate *PTF1A*<sup>enhΔ/enhΔ</sup> lines. **(D)** Agarose gel showing the PCR product generated when genotyping *PTF1A* enhancer region (744 bp) in 3 control cell lines (*PTF1A*<sup>+/+</sup>) and 6 homozygous cell lines with enhancer deletion (*PTF1A*<sup>enhΔ/enhΔ</sup>). Successful enhancer deletion generated PCR products of 423 bp for the g1+4 deletions and 617 bp for the g2+3 deletions. **(E)** Sanger sequencing chromatogram of the region flanking *PTF1A* enhancer deletion for six *PTF1A*<sup>enhΔ/enhΔ</sup> cell lines. **(F-G)** Proliferation is not altered in *PTF1A*<sup>enhΔ/enhΔ</sup> lines. **(F)** qRT-PCR of human MPCs for MKI67 proliferation marker ( $n = 10$  independent differentiation experiments per genotype, using 6 *PTF1A*<sup>enhΔ/enhΔ</sup> – 3 lines with 127 bp and 3 lines with 321 bp deletions). **(G)** pHH3 immunofluorescence (red) in DAPI-stained *PTF1A*<sup>enhΔ/enhΔ</sup> and control MPCs.



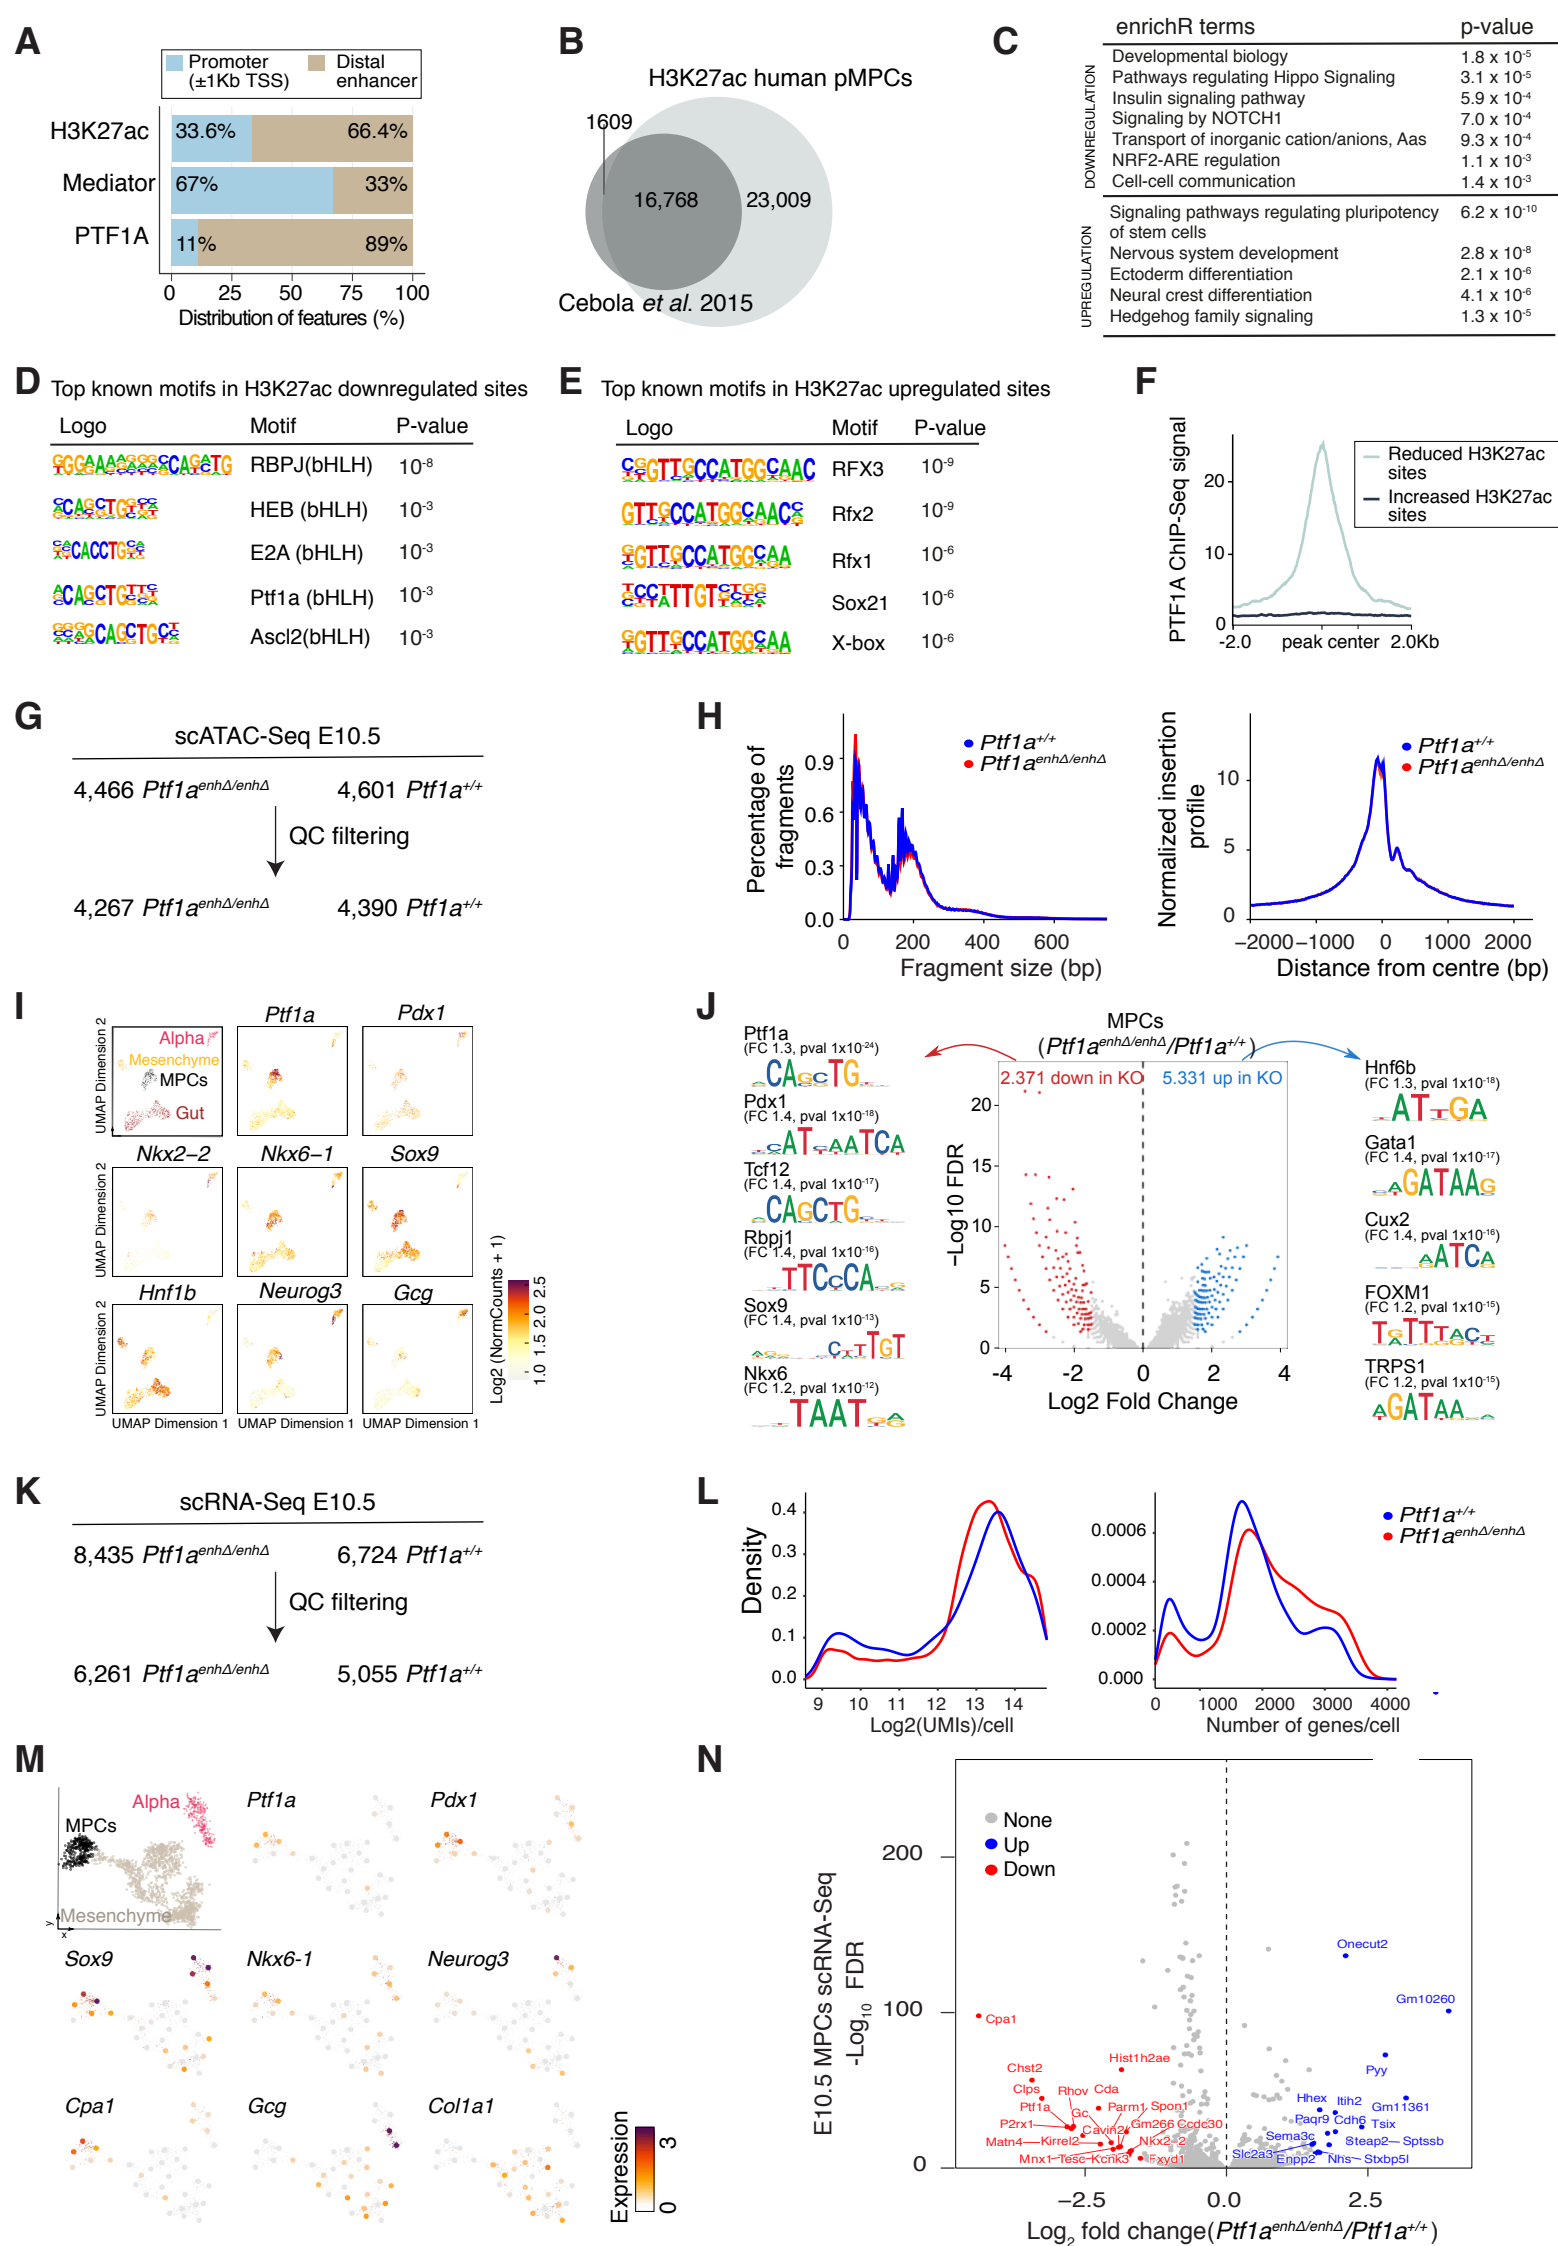

**Figure S3 - ChIP-Seq profiling of human MPCs and single cell analysis of *Ptf1a*<sup>enhΔ/enhΔ</sup> and *Ptf1a*<sup>+/+</sup> E10.5 mouse MPCs. Related to Figure 4.**

**(A)** Distribution of H3K27ac, Mediator and PTF1A binding sites in stage 4 derived human MPCs. Proximal sites were defined as 1Kb upstream or downstream of a TSS. **(B)** The majority (91%) of H3K27ac binding sites described in pancreatic MPCs by Cebola *et al.* 2015 were captured in the human MPC H3K27ac dataset from this study. **(C)** Functional term enrichment for genes associated with decreased H3K27ac sites in *PTF1A*<sup>enhΔ/enhΔ</sup> MPCs. **(D,E)** Top sequence motifs at sites with (D) downregulation and (E) upregulation of H3K27ac ( $q < 0.05$ ) in *PTF1A*<sup>enhΔ/enhΔ</sup> MPCs. **(F)** PTF1A binding signal at dysregulated H3K27ac sites. Regions that show reduced H3K27ac in *PTF1A*<sup>enhΔ/enhΔ</sup> MPCs are strongly bound by PTF1A. **(G)** Overview of the scATAC-Seq datasets generated from manually dissected E10.5 MPCs (n=5 embryos/genotype). **(H)** Fragment size distribution showing comparable nucleosomal binding patterns in *Ptf1a*<sup>enhΔ/enhΔ</sup> and *Ptf1a*<sup>+/+</sup> scATAC-Seq datasets (left), as well as enrichments in fragments centered around Ensembl TSS (right). **(I)** Normalized scATAC gene scores of selected marker genes shown on the UMAP projection. **(J)** Differentially accessible peaks between *Ptf1a*<sup>enhΔ/enhΔ</sup> and *Ptf1a*<sup>+/+</sup> E10.5 MPCs ( $\log_2$  fold-change  $\geq 1.5$ , binomial test FDR  $\leq 0.05$ ). Top motifs enriched in up- and down-regulated peaks are shown. **(K)** Overview of the scRNA-Seq dataset generated from manually dissected E10.5 MPCs (n=9 embryos/genotype). **(L)** QC metrics of E10.5 scRNA-Seq datasets including number of UMIs/gene (left) and number of genes captured per cell (right). **(M)** Normalized expression of selected marker genes shown on 2D projections. **(N)** Volcano plots showing differential single cell gene expression in E10.5 *Ptf1a*<sup>enhΔ/enhΔ</sup> MPCs. Mutant MPCs showed increased expression of some liver-enriched genes such as *Onecut2* and *Hhex*, though not others such as *For1* and *E2f2*, ventral pancreas-enriched genes (*Robo2*, *Onecut2*, Li et al., 2018) and bile duct epithelium-enriched *Krt17* (see **Table S3**).

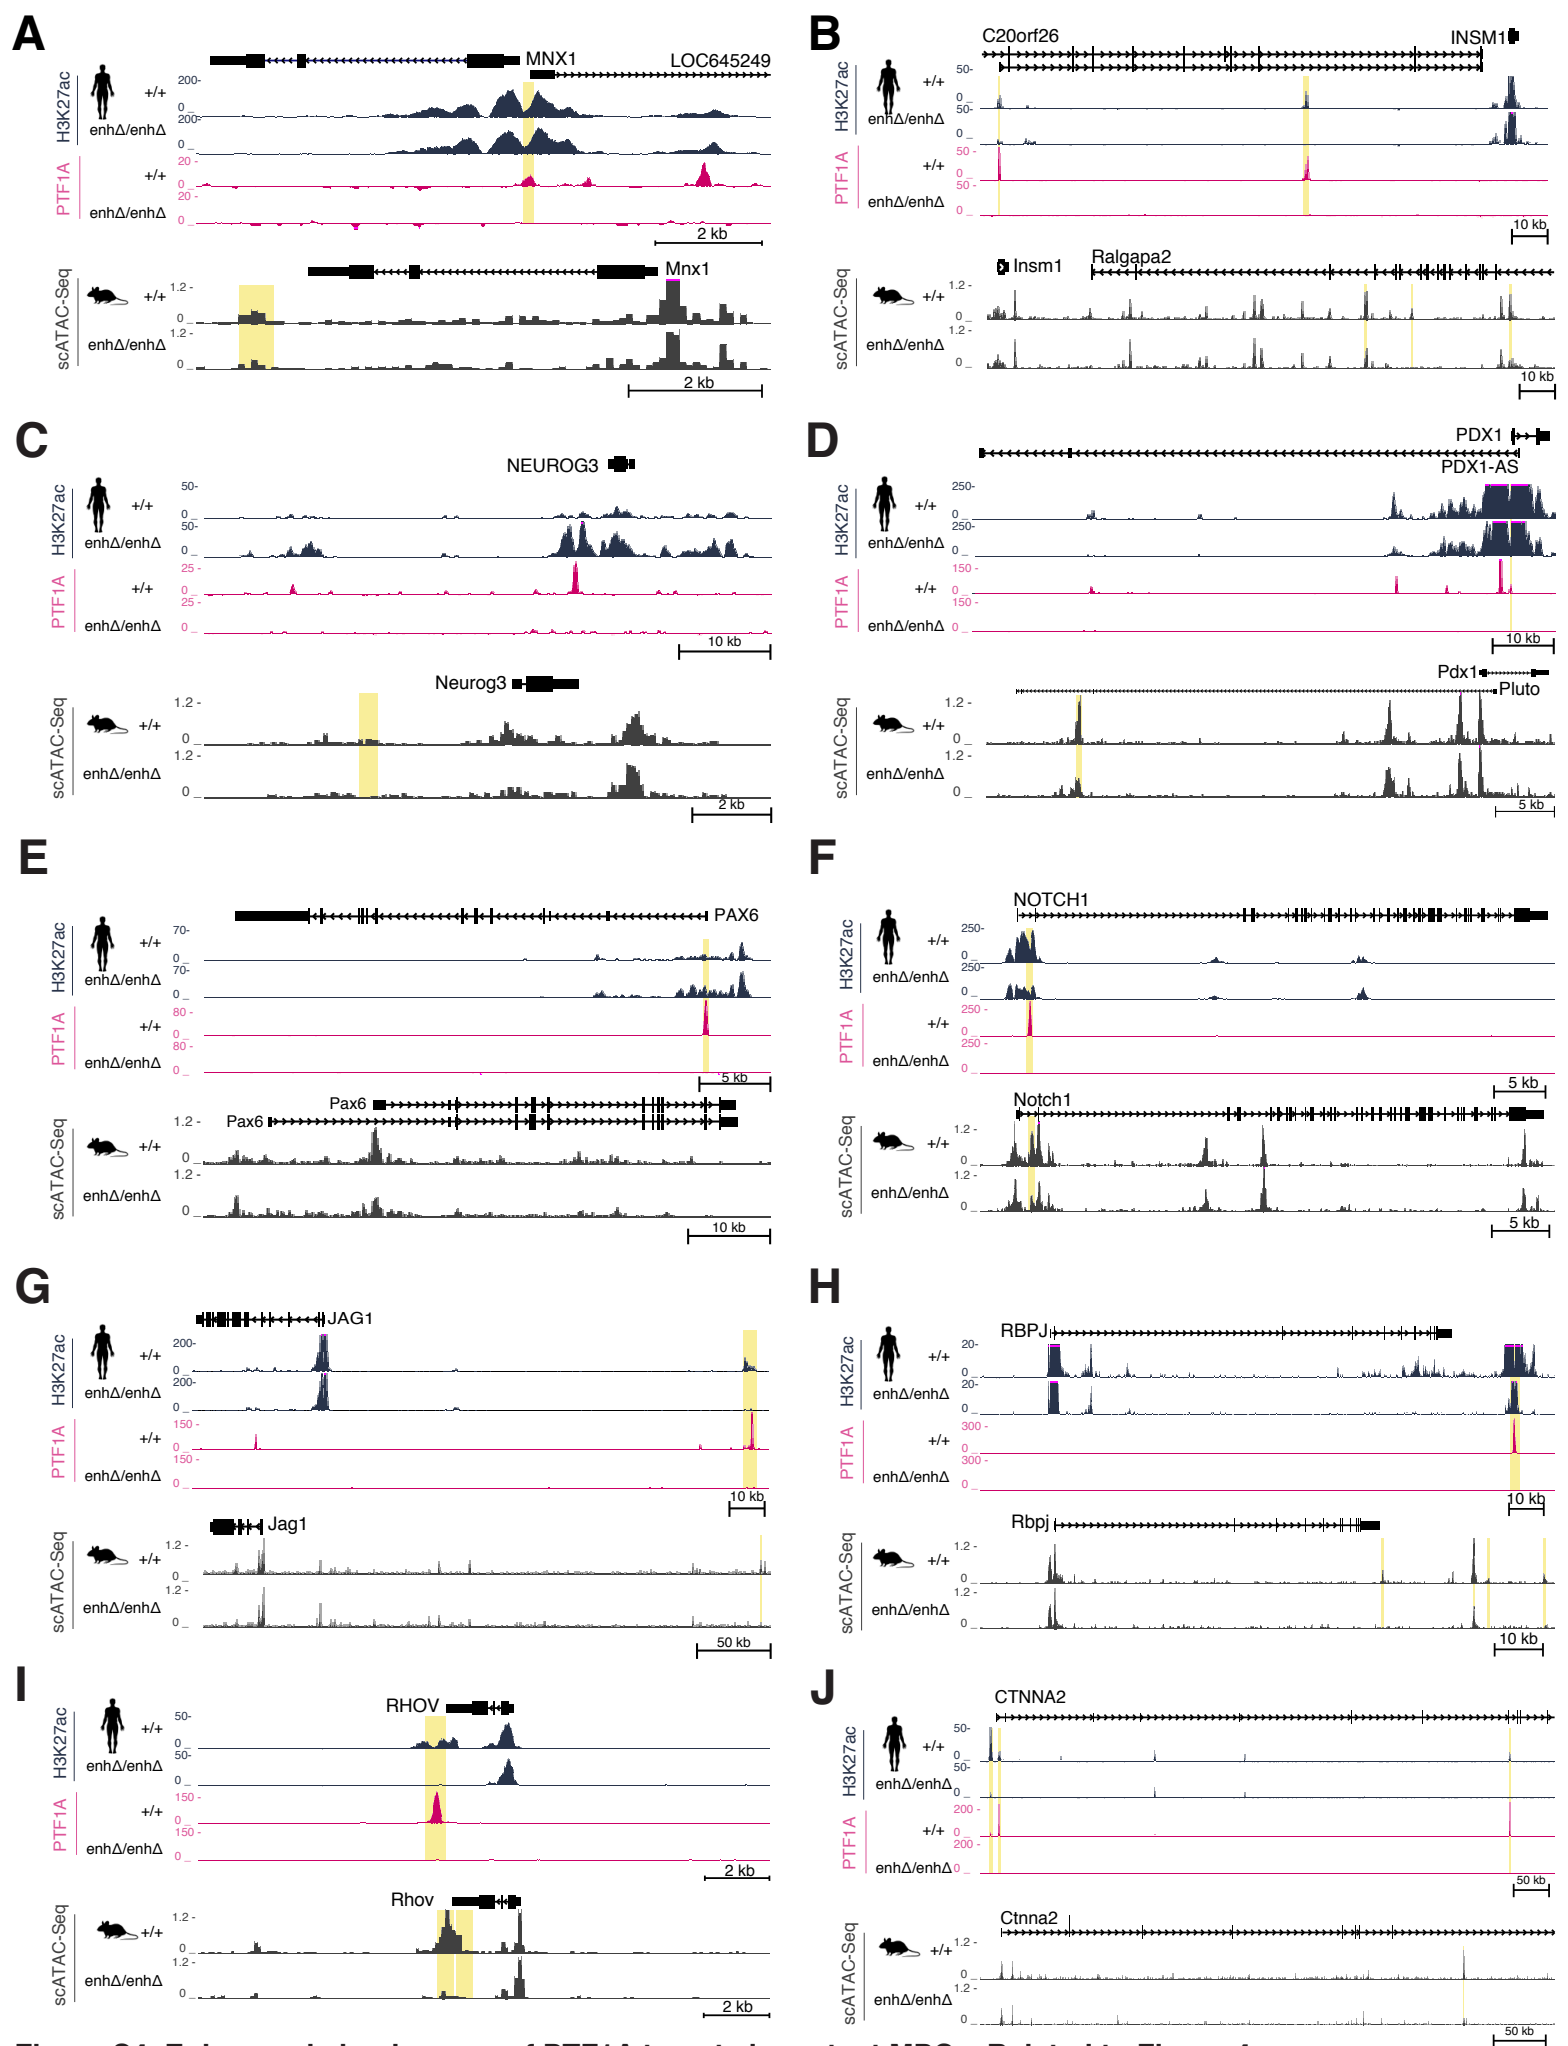

**Figure S4. Epigenomic landscapes of PTF1A targets in mutant MPCs. Related to Figure 4.** (A-J) Additional examples of loci showing altered chromatin at PTF1A-bound regions in human mutant cells, and altered chromatin in orthologous or syntenic regions in mouse mutant E10.5 MPCs. Shown are genes that regulate pancreas endocrinogenic transcription factors (*MNX1*, *INSM1*, *NEUROG3*, *PDX1*, *PAX6*), regulators of Notch signaling (*NOTCH1*, *RBPJ* and *JAG1*) and tubulogenesis (*RHOV*, *CTNNA2*). Mouse tracks show aggregated MPC single cell chromatin accessibility.



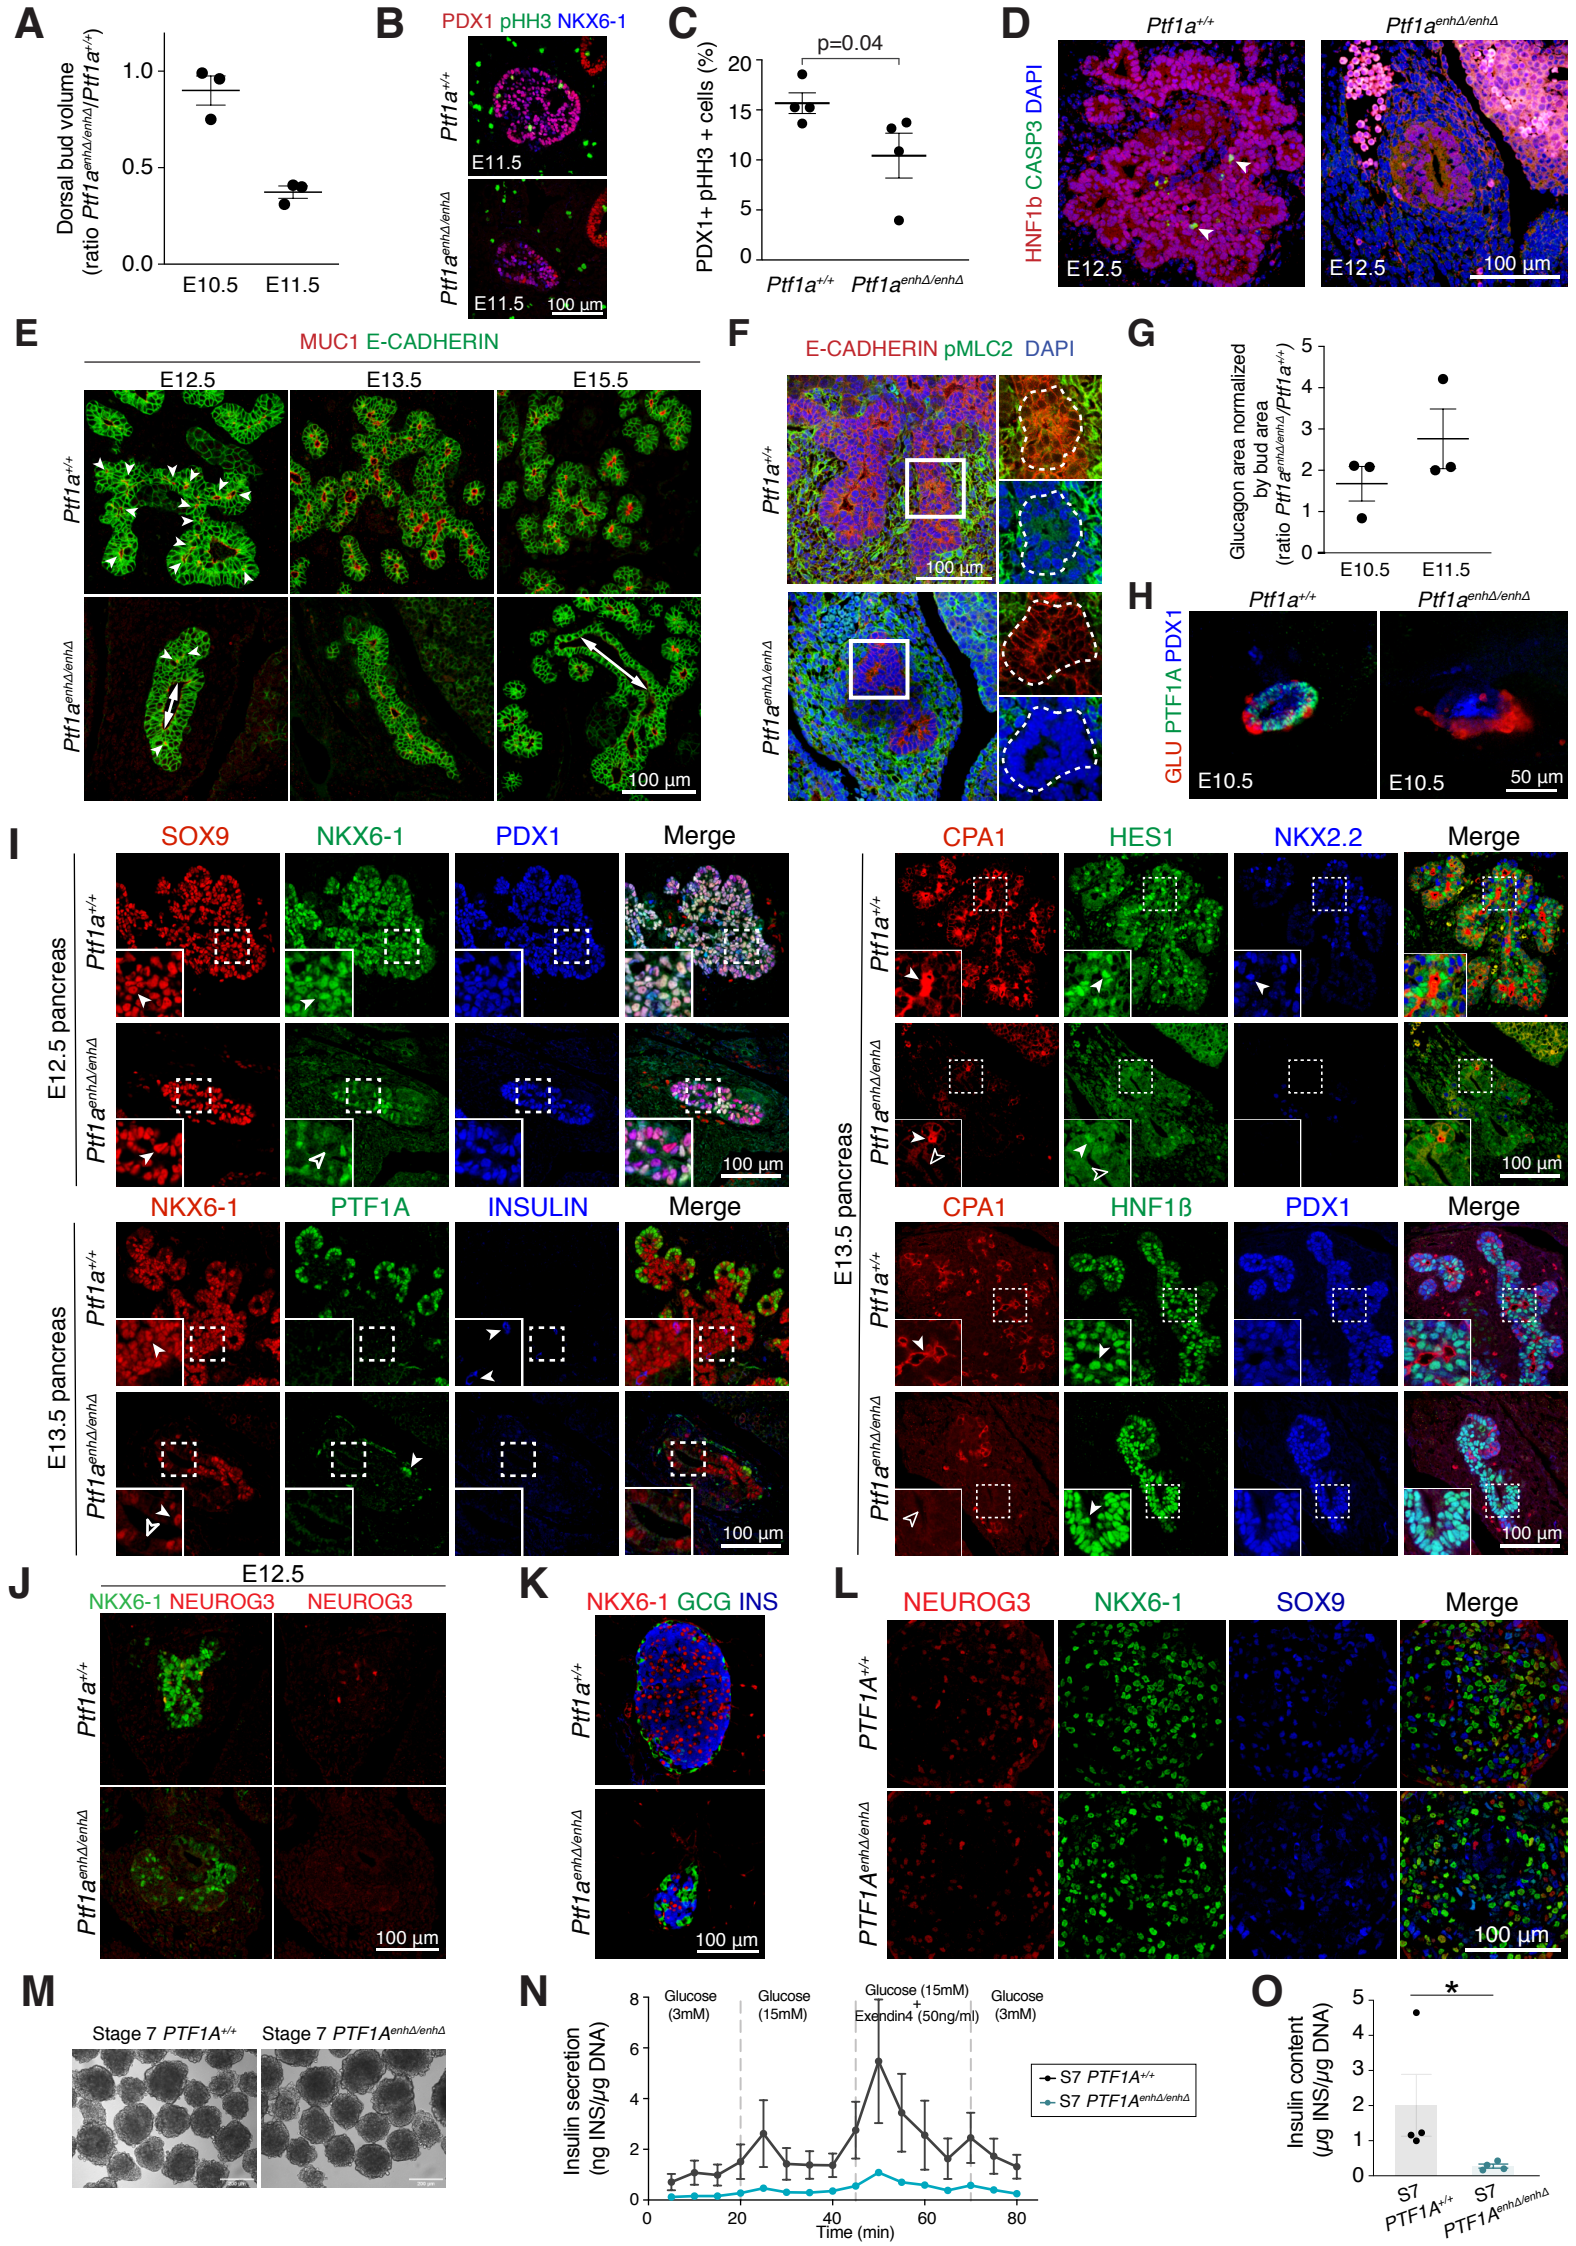

**Figure S5. Defective growth and morphogenesis in *PTF1A*<sup>enhP</sup> mutants leads to defective trunk cell differentiation. Related to Figure 5.**

**(A)** Dorsal pancreatic bud volumes quantified from *in toto* immunofluorescence, showing decreased size in E10.5 and E11.5 mutant embryos. Volumes are expressed as ratios in *Ptf1a*<sup>enhΔ/enhΔ</sup> vs. *Ptf1a*<sup>+/+</sup> embryos at E10.5 or E11.5; n = 3 for each stage and genotype, analyzed with Student's t-test. **(B)** pHH3 immunofluorescence (green) in PDX1+ (red) NKX6-1+ (blue) MPCs from E11.5 *Ptf1a*<sup>enhΔ/enhΔ</sup> and *Ptf1a*<sup>+/+</sup> embryos. **(C)** Percentage of PDX1+ MPCs from E10.5 and E11.5 embryos that show proliferative marker pHH3. n = 4 embryos/genotype, analyzed with Student's t-test. **(D)** Caspase3 immunofluorescence analysis showing no increase in apoptosis in mutant E12.5 pancreas. Arrowheads indicate apoptotic cells. **(E)** Mucin1 (red), E-cadherin (green) co-staining show preserved apical Mucin, decreased number of microlumens (arrows), as well as reduced epithelial outgrowth and arborization of the mutant pancreas. **(F)** Loss of apical pMycosin light chain 2 (pMLC2, green) in *Ptf1a*<sup>enhΔ/enhΔ</sup> E12.5 pancreatic epithelial cells. Right panels are zoomed-in images of the squared sections. White dotted lines indicate rosettes around lumen. **(G)** Quantification of first transition endocrine cells in E10.5 and E11.5 *Ptf1a*<sup>enhΔ/enhΔ</sup> vs. *Ptf1a*<sup>+/+</sup> embryos showed preserved endocrine cell formation. By E11.5, as the pancreatic mutant growth defect became more apparent, there was a visible increase in the relative area of glucagon+ cells/PDX1+ cells from the dorsal and ventral buds (n=3 embryos/genotype). **(H)** Representative image of an E10.5 *Ptf1a*<sup>enhΔ/enhΔ</sup> dorsal bud with a relative increase in glucagon+ cells. See also **Video S1** and **Figure 2C**. **(I)** A subset of trunk cells in E12.5 or E13.5 *Ptf1a*<sup>enhΔ/enhΔ</sup> pancreas lack expression of bipotent progenitor differentiation markers including NKX2-2, NKX6-1, and nuclear HES1, whereas HNF1B expression is maintained, and SOX9 is expressed at moderately reduced levels. Inset panels are zoomed-in images of dotted areas. Solid arrowheads indicate expected expression while empty arrowheads indicate lack of expression. **(J)** E12.5 pancreas from *Ptf1a*<sup>enhΔ/enhΔ</sup> embryos shows marked reduction of NEUROG3+ endocrine progenitors. **(K)** Large islets were never observed in adult *Ptf1a*<sup>enhΔ/enhΔ</sup> mice. Illustrative example of a small islet in an adult mutant mouse. **(L)** NEUROG3 expression is reduced in *PTF1A*<sup>enhΔ/enhΔ</sup> beta cell-like (stage 7) islets. **(M)** Representative brightfield images of *PTF1A*<sup>enhΔ/enhΔ</sup> and control beta cell-like islets used in perfusion experiments. **(N)** Decreased dynamic insulin secretion response in *PTF1A*<sup>enhΔ/enhΔ</sup> beta cell-like (stage 7) islets (n = 2 independent experiments, using 2 replicates each). **(O)** Decreased average total insulin content in *PTF1A*<sup>enhΔ/enhΔ</sup> beta cell-like (stage 7) islets (n = 4).

**A**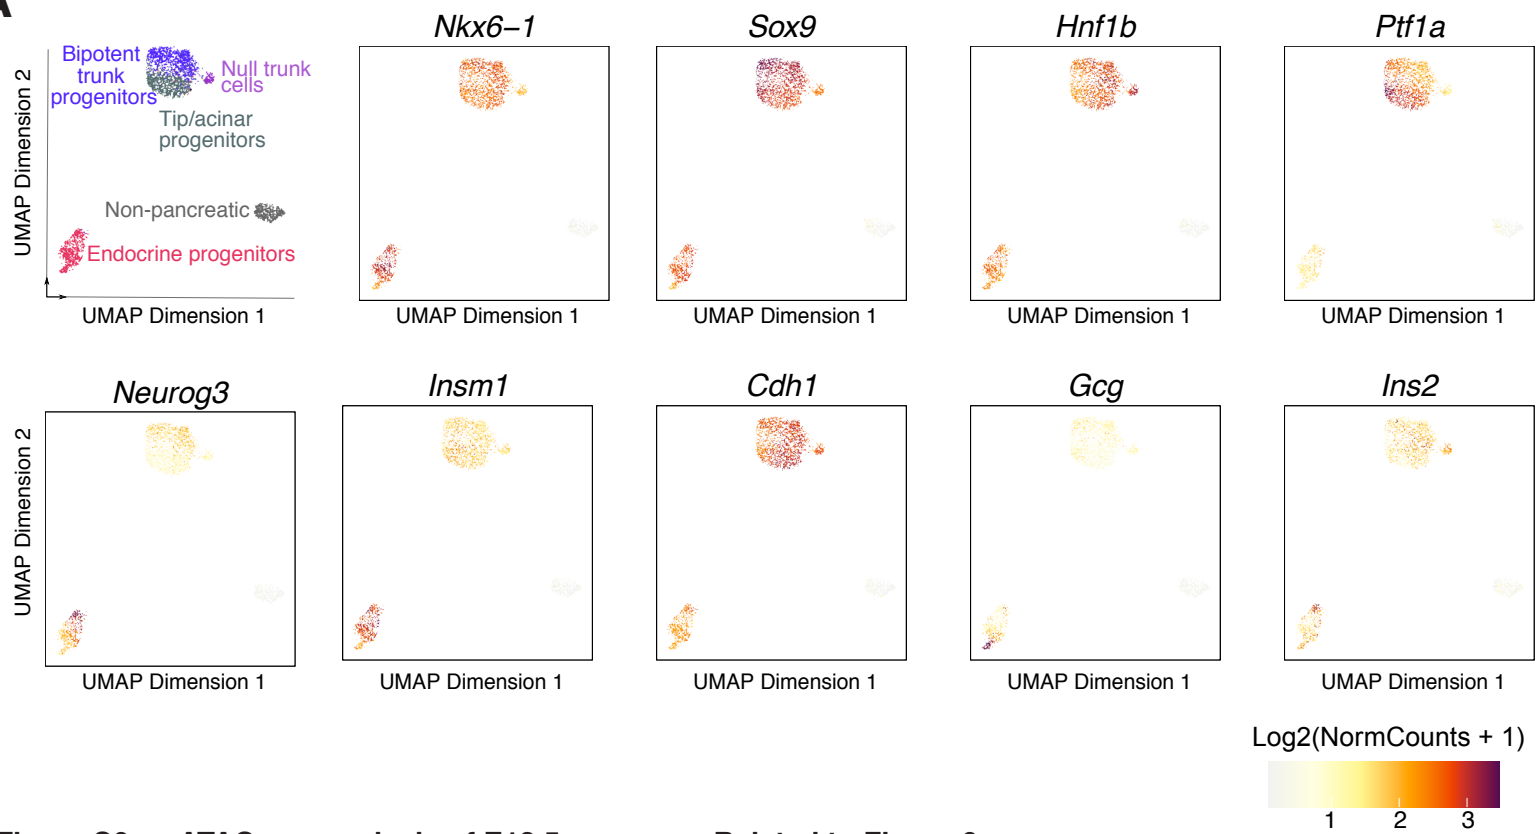

**Figure S6. scATAC-seq analysis of E13.5 pancreas. Related to Figure 6.**

**(A)** Normalized gene scores of selected marker genes shown on the UMAP projection of E13.5 scATAC-Seq dataset.



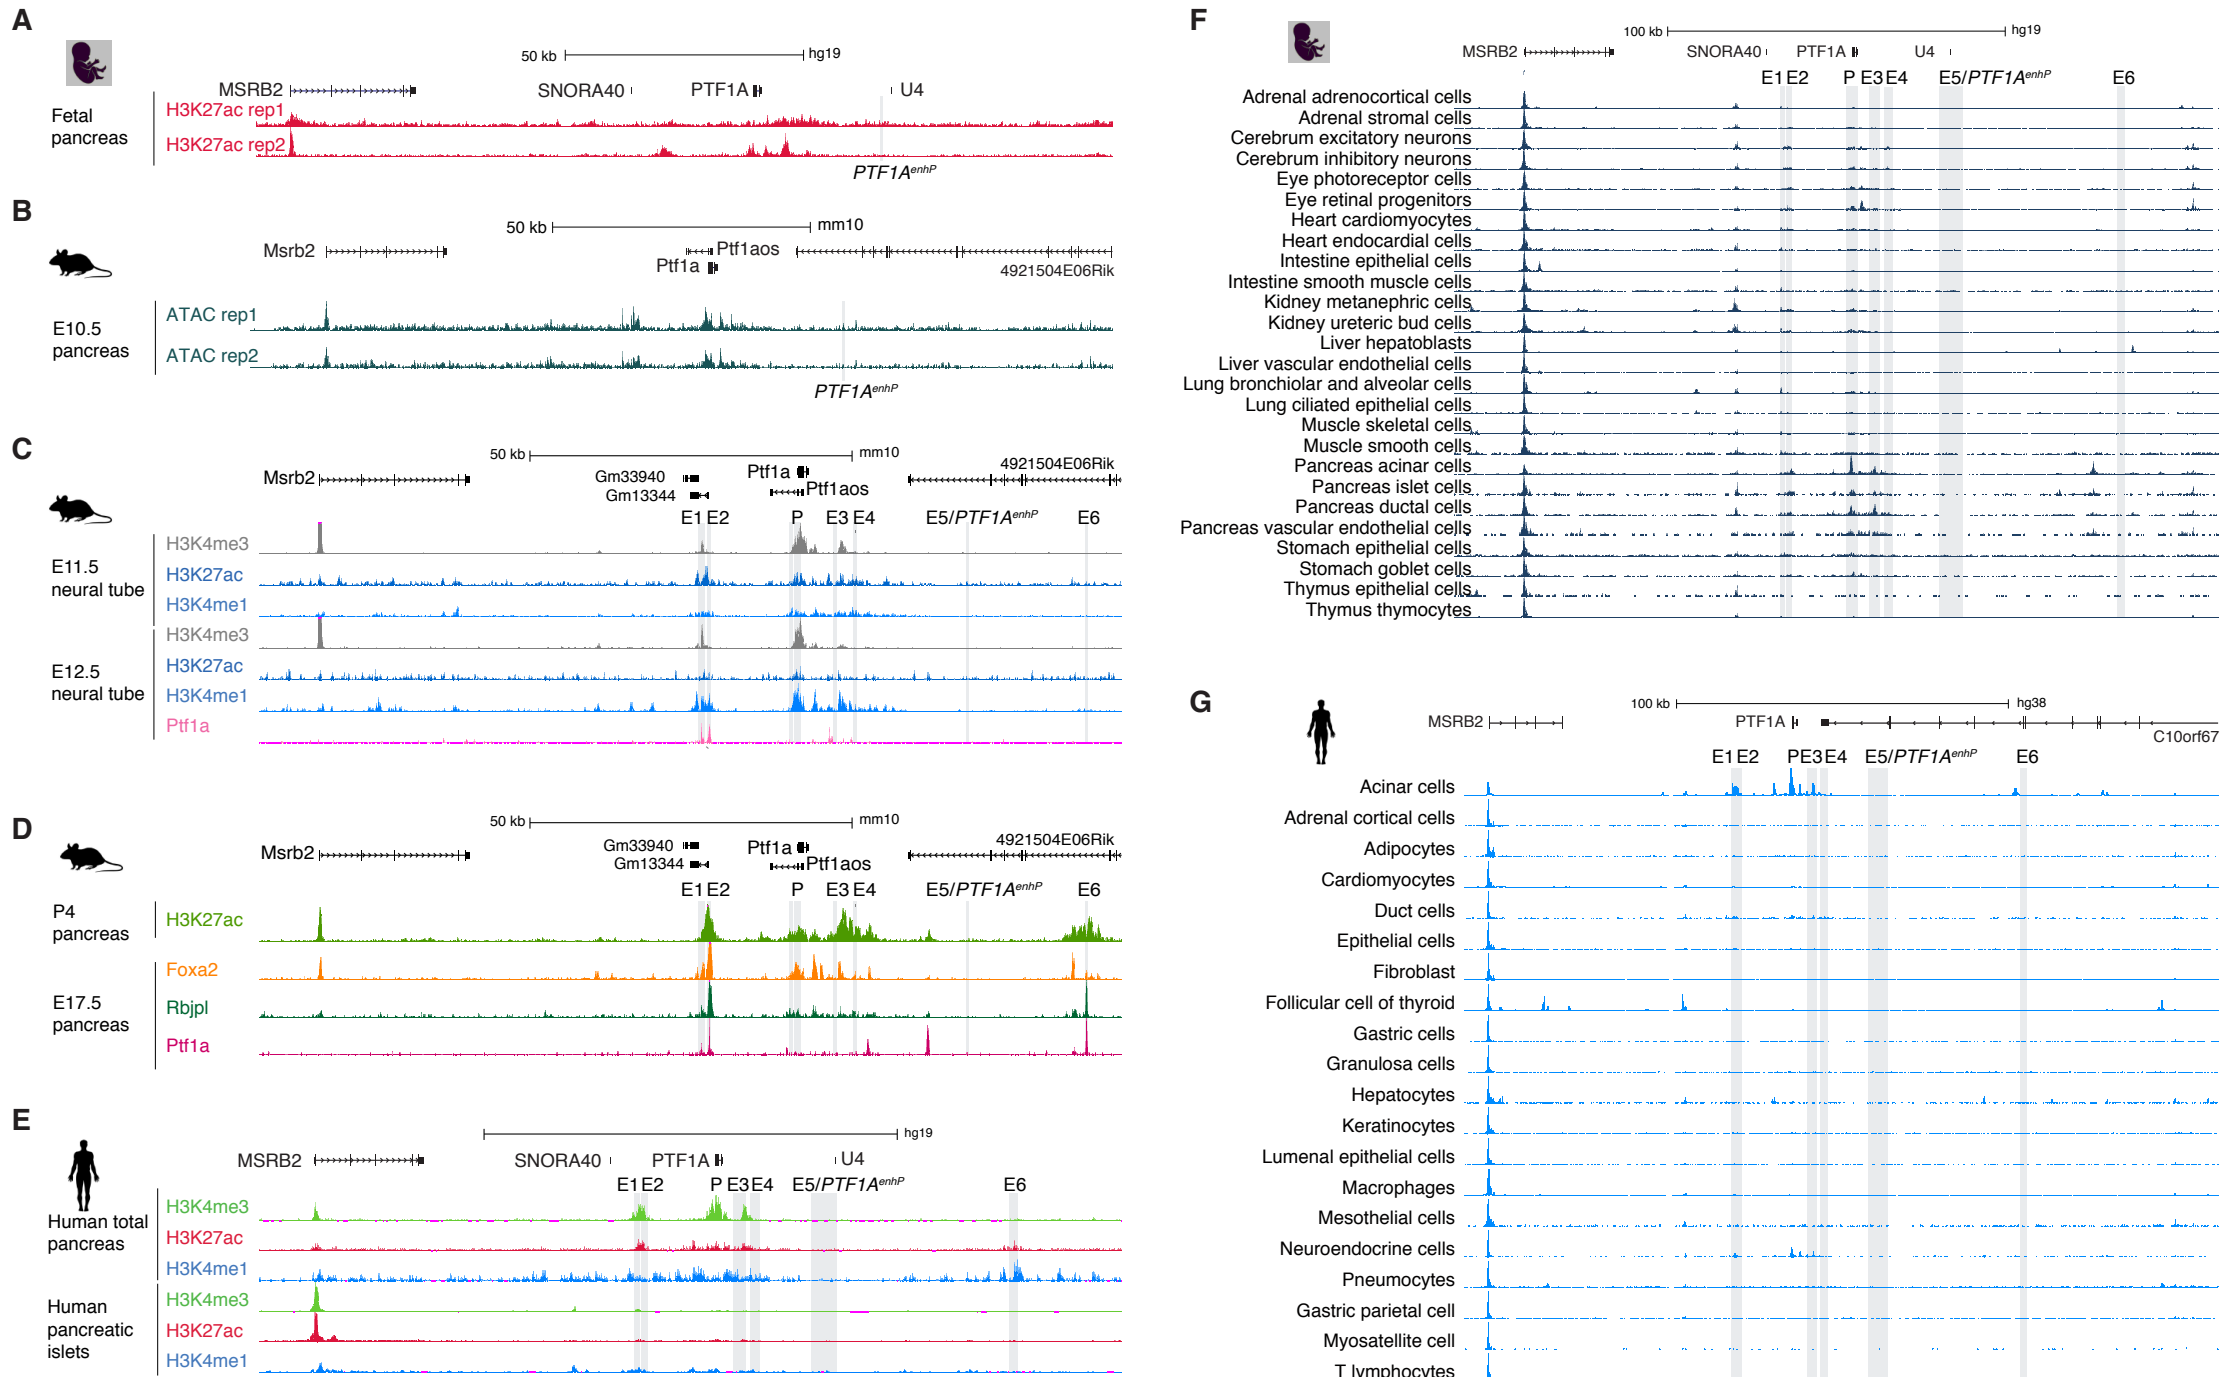

**Figure S7. *PTF1A*<sup>enhP</sup> is specific to MPCs. Related to Figure 7.**

(A,B) *PTF1A*<sup>enhP</sup> is not marked by H3K27ac in chromatin from bulk C19-C21 human fetal pancreas (Gerrard *et al.* 2020), and shows weak accessibility in bulk ATAC-Seq from dissected E10.5 mouse pancreatic buds. (C) *PTF1A*<sup>enhP</sup> is not active in mouse embryonic neural tube. E11.5 and E12.5 histone mark ChIP-Seq datasets are from ENCODE Project Consortium (2020). *PTF1A* ChIP-Seq in neural tube was re-analyzed from (Meredith *et al.* 2013). Grey highlights point to E1-6 enhancers, as depicted in Figure 7. (D,E) *PTF1A*<sup>enhP</sup> is not active in mouse perinatal pancreas or adult human pancreas or pancreatic islets. Mouse pancreas H3K27ac ChIP-Seq datasets were re-analyzed from Kalisz *et al.* 2020 and transcription factor ChIPs are from (Meredith *et al.* 2013). Histone mark ChIP-Seq datasets from total human pancreas and islets were taken from Human Epigenome Consortium (2020) and Miguel-Escalada *et al.*, 2019 respectively. Sequence-depth normalized ChIP signal is shown, where none of the samples have chromatin accessibility in the E5/*PTF1A*<sup>enhP</sup> region. (F,G) *PTF1A*<sup>enhP</sup> is not accessible in a range of human fetal tissues (Domcke *et al.*, 2020) or adult tissues (Zhang *et al.*, 2021) profiled by scATAC-Seq. Representative cell types from the atlas are shown, where none of the samples have chromatin accessibility in the *PTF1A*<sup>enhP</sup> region.
